# Supplementary material for: Rational design of COF–MOF composites for ratiometric fluorescence detection of phosphate
Source: Royal Society of Chemistry journal article supplement (doi:10.1039/d3nj00149k), 2023-01-01
Supplement: d3nj00149k1.pdf [file d3nj00149k1.pdf]

**Supplementary Data for:**

**Rational design of COF-MOF composites for ratiometric fluorescence  
detection of phosphate**

Yun-Jie Yu,<sup>†</sup> Wei Li,<sup>‡</sup> Shi-Bin Ren,<sup>‡</sup> Xian-Jing Zhou,<sup>†</sup> De-Man Han<sup>\*,†,‡</sup>

<sup>†</sup> Department of Chemistry, Key Laboratory of Surface & Interface Science of Polymer Materials of  
Zhejiang Province, Zhejiang Sci-Tech University, Hangzhou 310018, China

<sup>‡</sup> School of Pharmaceutical and Materials Engineering, Taizhou University, Jiaojiang 318000  
Zhejiang, China

\*Corresponding author: De-Man Han.

E-mail address: hdm@tzc.edu.cn

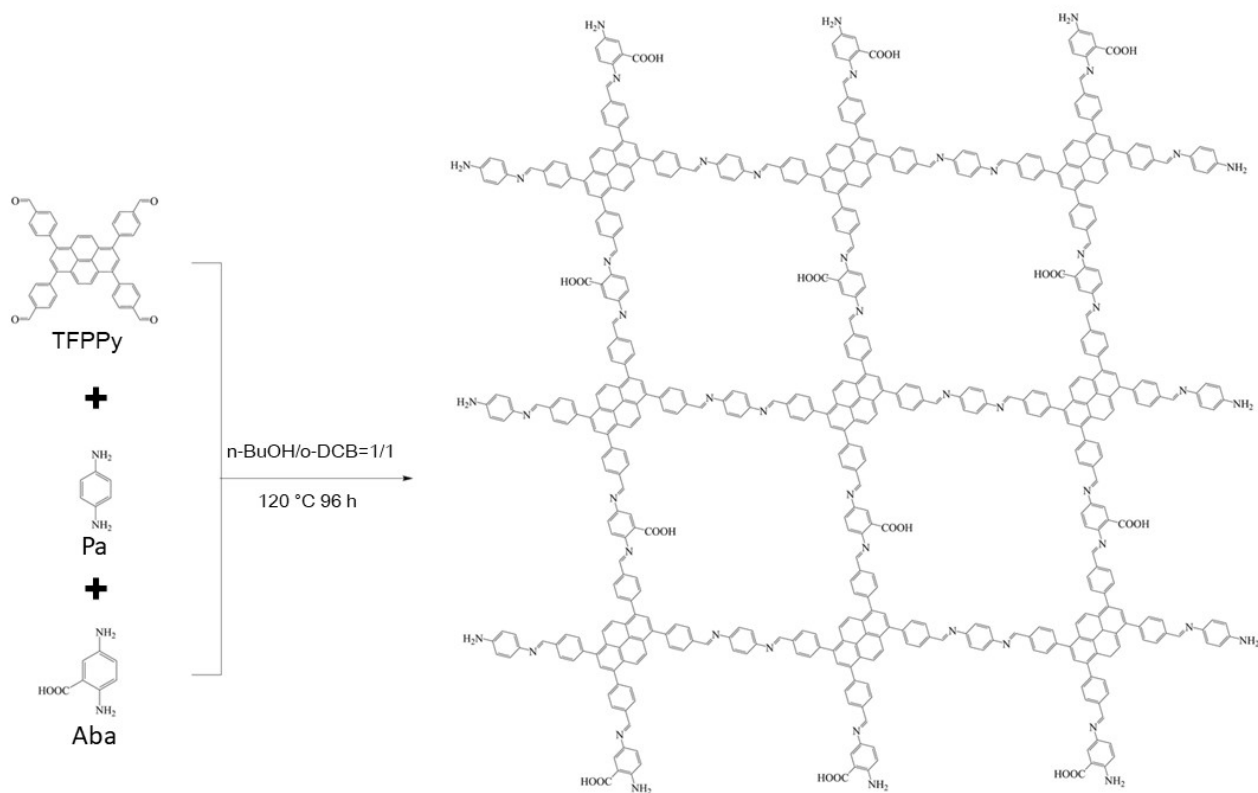

**Fig. S1.** Illustration for the synthesis of COF via the condensation reaction between TFPPy, Pa and ABA.

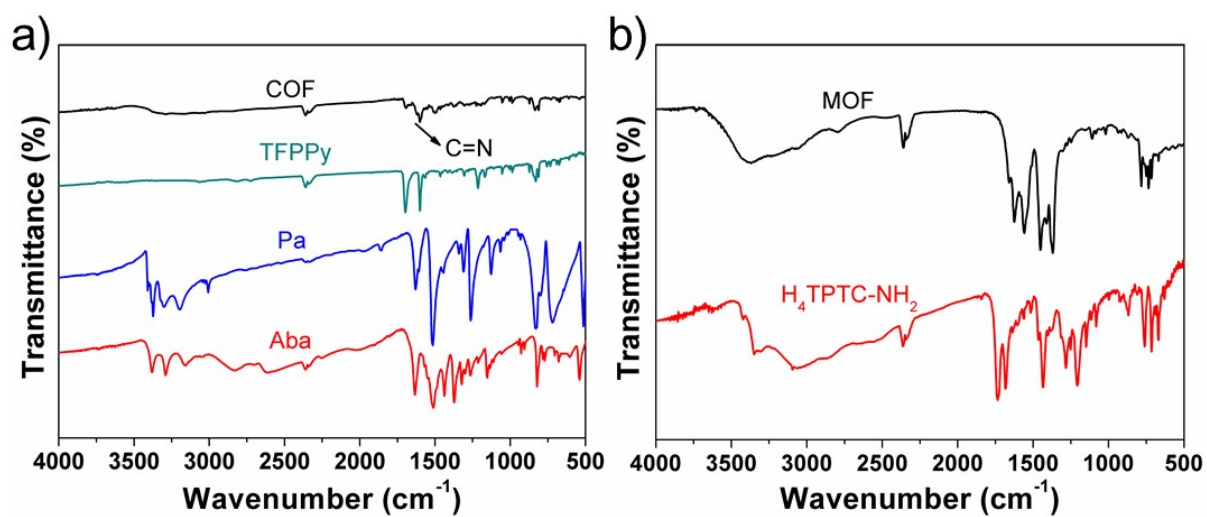

**Fig. S2.** (a) FT-IR spectrum of COF, TFPPy, Pa and Aba; (b) FT-IR spectrum of  $\text{H}_4\text{TPTC-NH}_2$  and MOF.

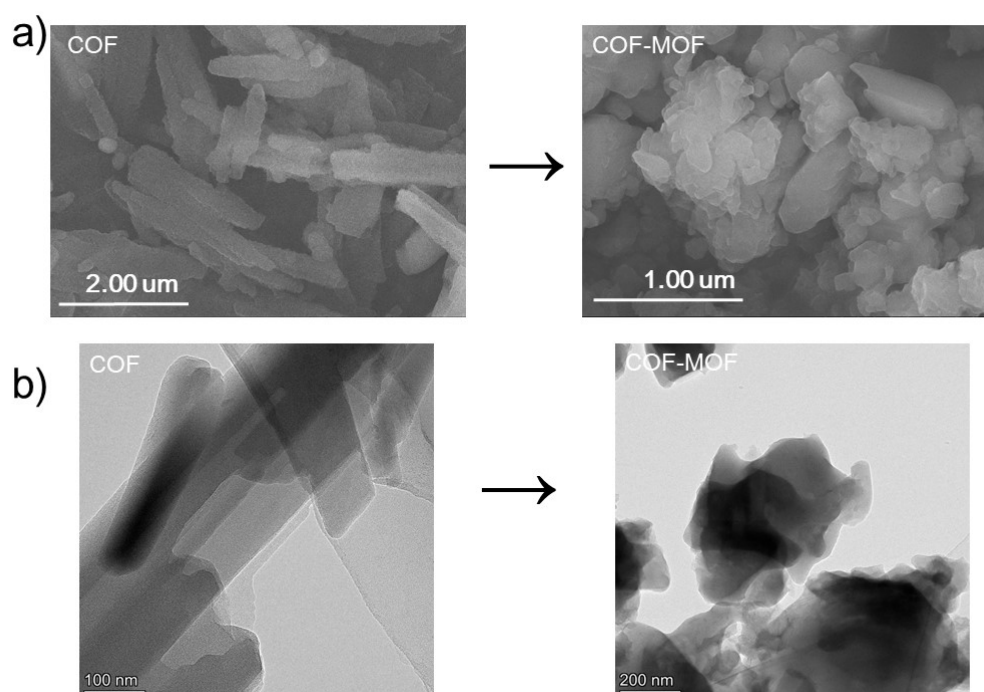

**Fig. S3.** SEM and TEM images of COF and COF-MOF.

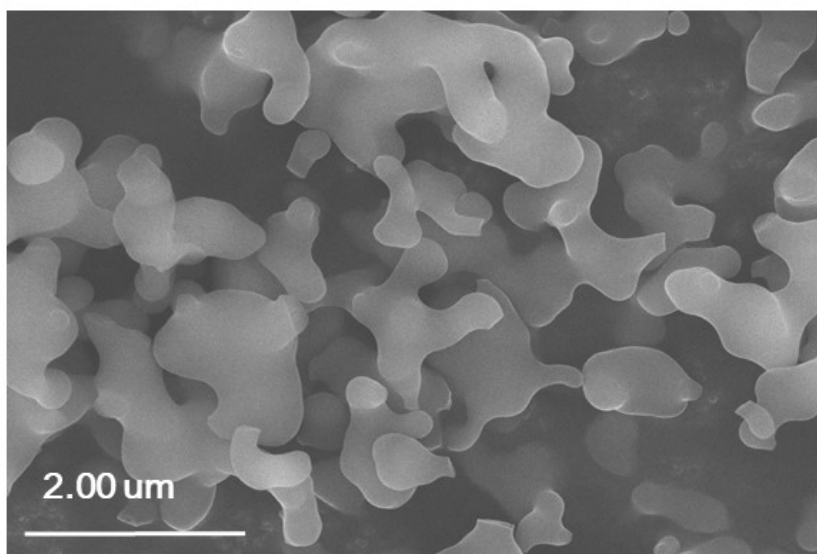

**Fig. S4.** SEM images of MOF.

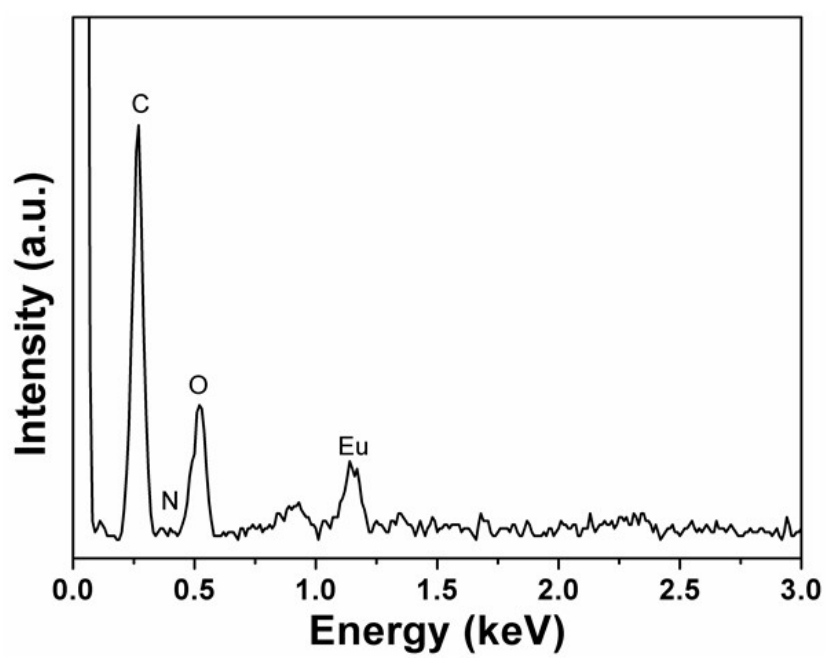

**Fig. S5.** The EDX element analysis of COF-MOF.

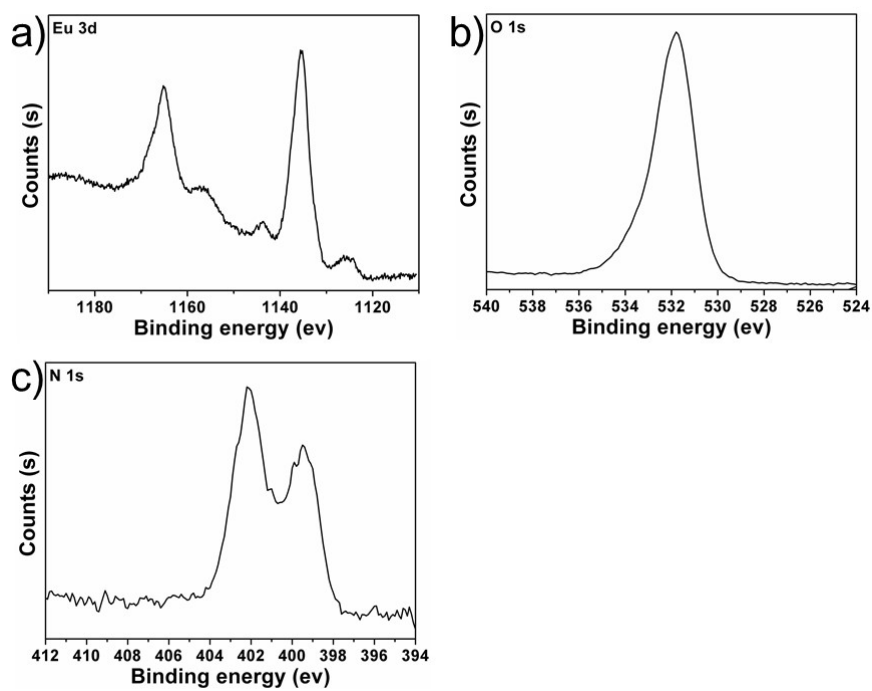

**Fig. S6.** The XPS spectrum of Eu 3d (a), O 1s (b) and N 1s (c) for COF-MOF.

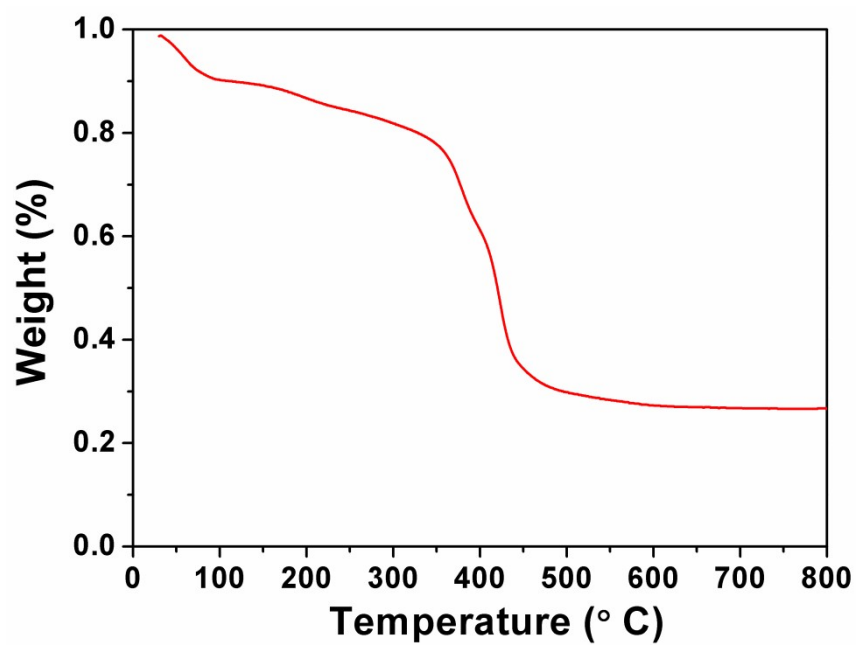

**Fig. S7** TGA spectrum of COF-MOF.

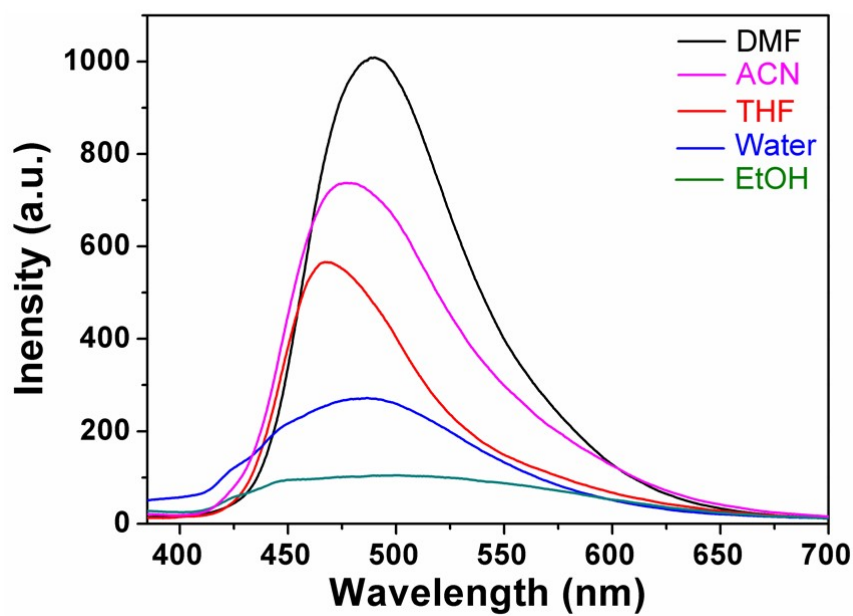

Fig. S8. The fluorescence spectrum of COF-MOF in different solvent.

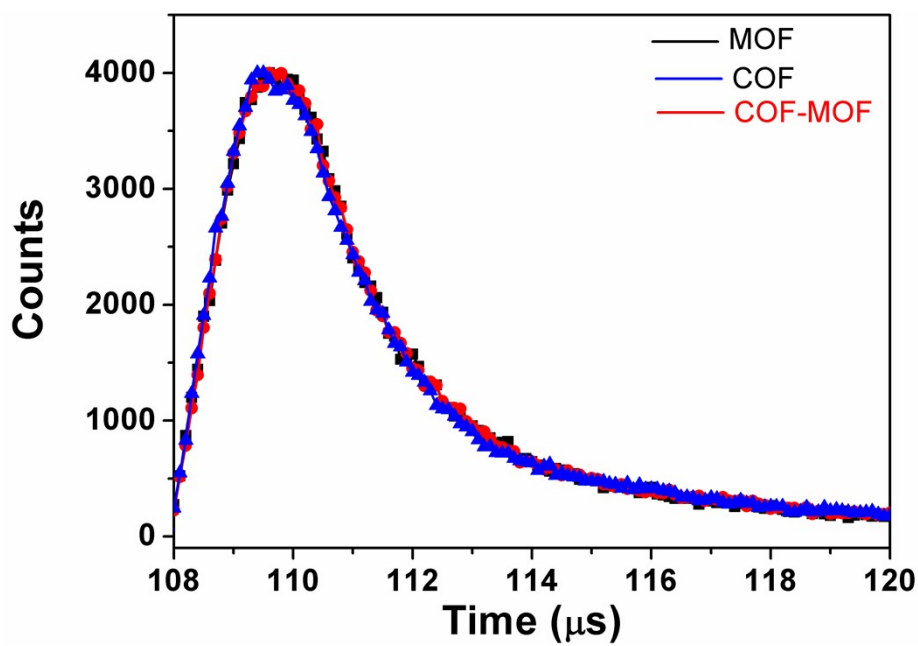

Fig. S9. The fluorescence lifetime of COF, MOF and COF-MOF.

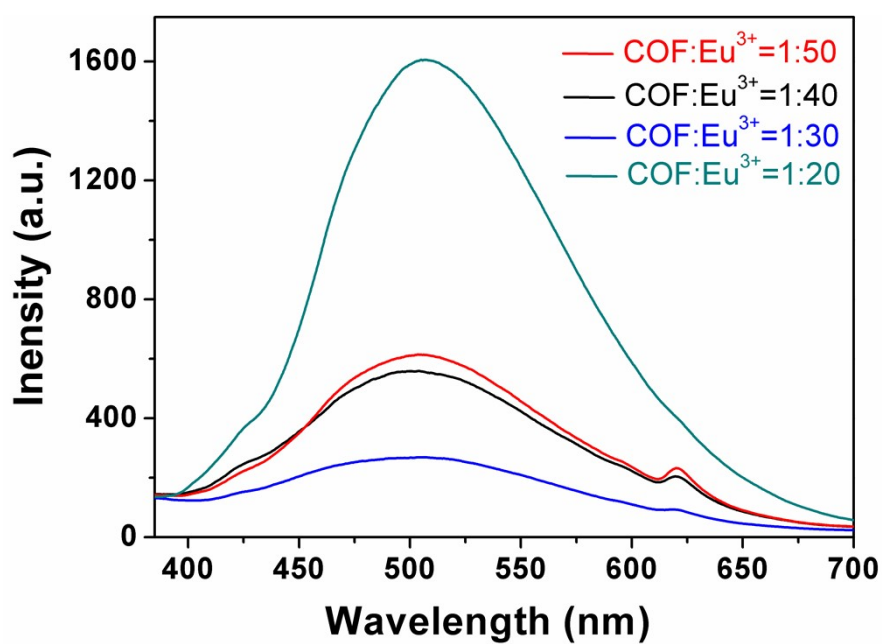

**Fig. S10.** The fluorescence of COF-MOF with different mass ratio of COF/  $\text{Eu}^{3+}$ .

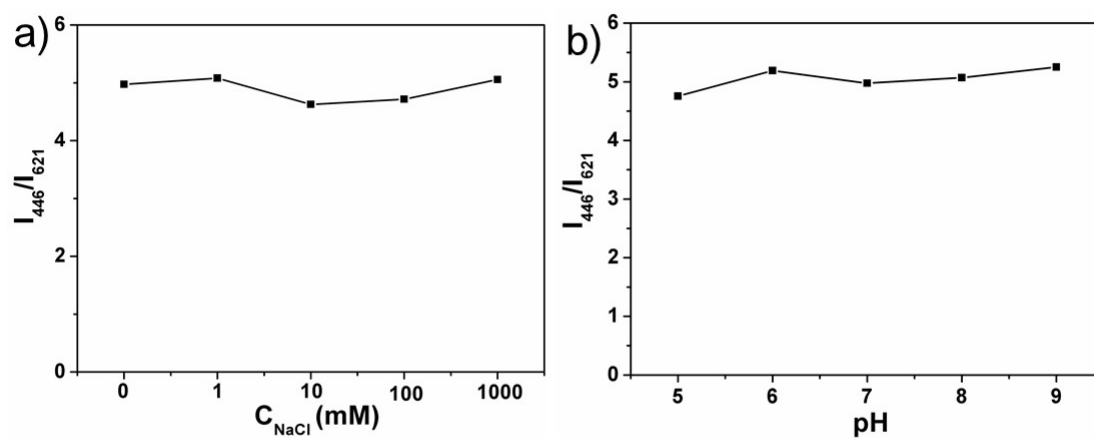

**Fig. S11** The fluorescence stability of COF-MOF in different concentration of NaCl (a) and pH (b).

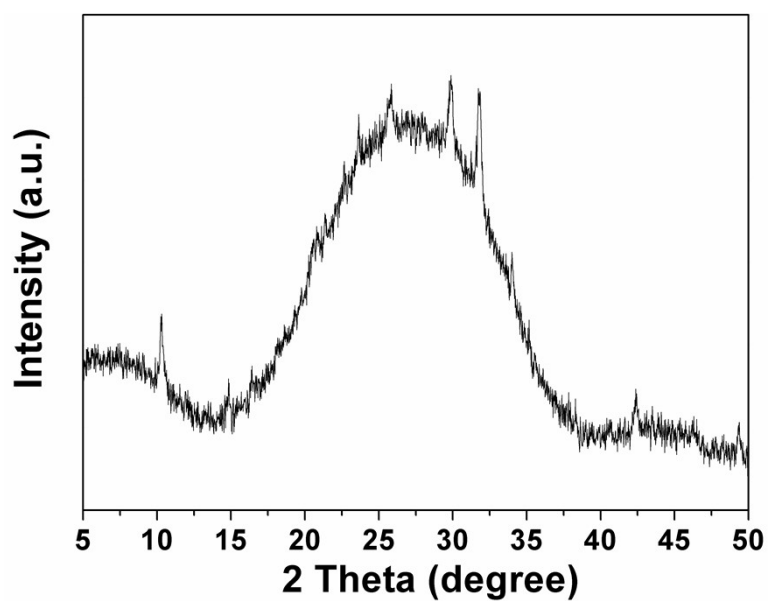

**Fig. S12.** The XRD of COF-MOF after phosphate addition.

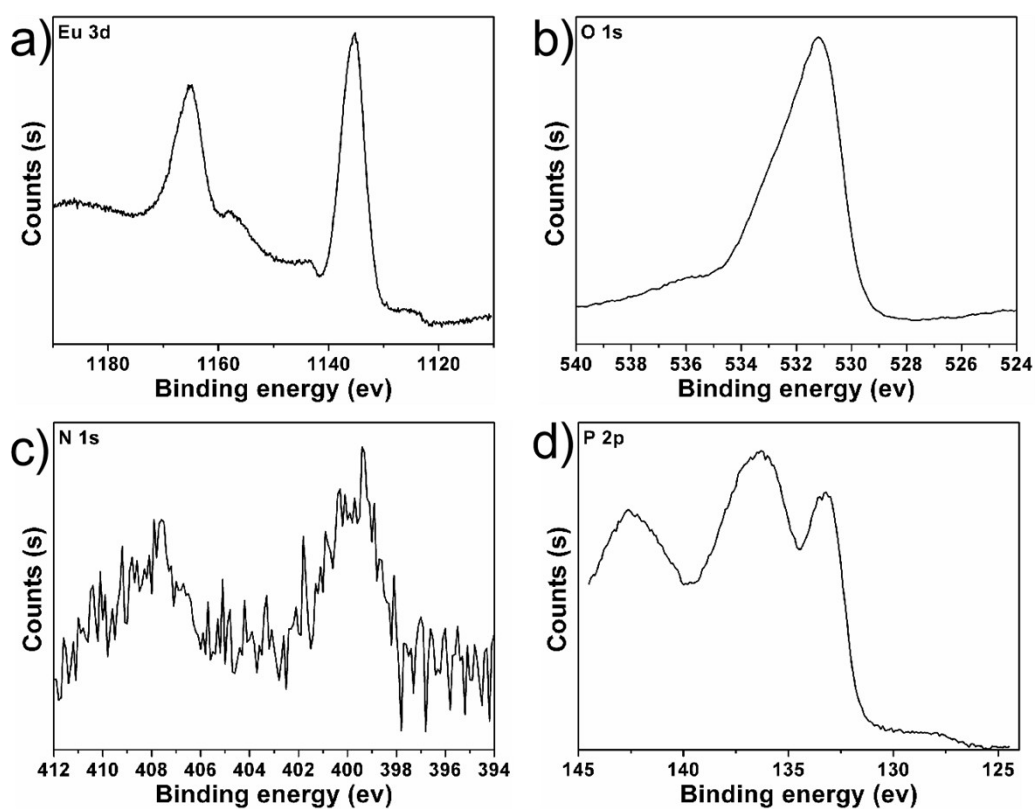

**Fig. S13.** The XPS spectrum of Eu 3d (a), O 1s (b) , N 1s (c) and P 2p (d) for COF-MOF after phosphate addition.



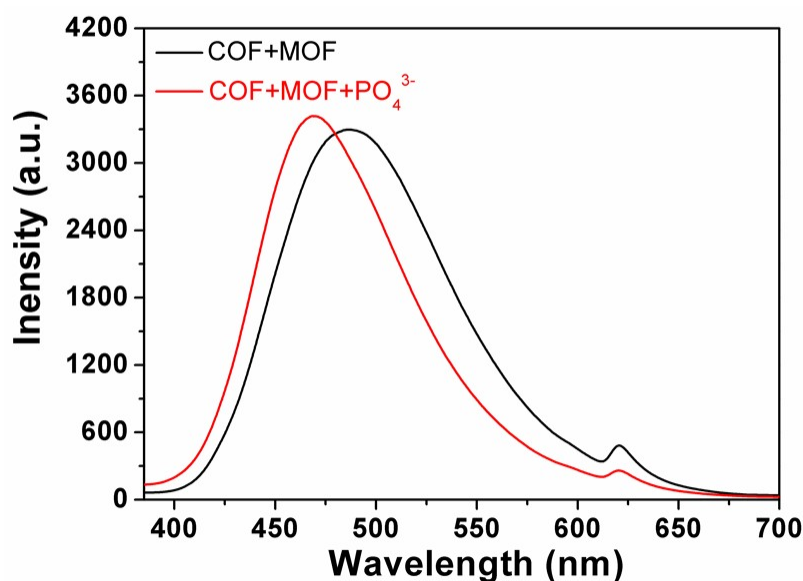

**Fig. S14.** The fluorescence spectrum of COF + MOF before or upon 100  $\mu\text{M}$  phosphate addition.

**Table S1**

Comparison of analytical performance for phosphate detection by our strategy and those reported in literature

| Method      | Detection Limit ( $\mu\text{M}$ ) | Strategy                                                                                                                                                    | Ref.      |
|-------------|-----------------------------------|-------------------------------------------------------------------------------------------------------------------------------------------------------------|-----------|
| Fluorescent | 0.39                              | A Terbium(III)-Complex-Based On–Off Fluorescent Chemosensor for Phosphate Anions in Aqueous Solution and Its Application in Molecular Logic Gates           | 1         |
| Fluorescent | 2                                 | MOF@COFs with Strong Multiemission for Differentiation and Ratiometric Fluorescence Detection                                                               | 2         |
| Fluorescent | 10                                | A Water-Stable Lanthanide-organic Framework as a Recyclable Luminescent Probe for Detecting Pollutant Phosphorus Anions                                     | 3         |
| Fluorescent | 1                                 | A Postsynthetically Modified MOF Hybrid as a Ratiometric Fluorescent Sensor for Anion Recognition and Detection                                             | 4         |
| Fluorescent | 0.61                              | Imine-Linked Covalent Organic Framework with a Naphthalene Moiety as a Sensitive Phosphate Ion Sensing                                                      | 5         |
| Fluorescent | 1.25                              | Metal–Organic Frameworks with Inherent Recognition Sites for Selective Phosphate Sensing through Their Coordination-Induced Fluorescence Enhancement Effect | 6         |
| Fluorescent | 0.81                              | Phosphate Ion Targeted Colorimetric and Fluorescent Probe and Its Use to Monitor Endogeneous Phosphate Ion in a Hemichannel-Closed Cell                     | 7         |
| Fluorescent | 0.95                              | COF-MOF based ratiometric fluorescence detection of phosphate                                                                                               | This work |

**Table S2**

Analytical Results for the Determination of phosphate in water samples.

| Samples       | Spiked phosphate<br>/ $\mu\text{M}$ | Concentration found (mean $\pm$ <i>s</i> , <i>n</i> =<br>3) | PBS <sup>a</sup> method (mean $\pm$ <i>s</i> , <i>n</i> = 3 ) |
|---------------|-------------------------------------|-------------------------------------------------------------|---------------------------------------------------------------|
| Tap water     | 0                                   | Not detected                                                | ---                                                           |
|               | 50 $\mu\text{M}$                    | 49.2 $\pm$ 1.2 $\mu\text{M}$                                | ---                                                           |
|               | 25 $\mu\text{M}$                    | 24.8 $\pm$ 0.5 $\mu\text{M}$                                | ---                                                           |
| Lake water    | 0                                   | Not detected                                                | ---                                                           |
|               | 50 $\mu\text{M}$                    | 51.3 $\pm$ 1.3 $\mu\text{M}$                                | ---                                                           |
|               | 25 $\mu\text{M}$                    | 25.4 $\pm$ 0.7 $\mu\text{M}$                                | ---                                                           |
| Human urine 1 | 0                                   | 11.66 $\pm$ 0.22 mM                                         | 11.78 $\pm$ 0.18 mM                                           |
| Human urine 2 | 0                                   | 10.98 $\pm$ 0.16 mM                                         | 11.12 $\pm$ 0.23 mM                                           |

<sup>a</sup> PBS:Phosphomolybdenum blue spectrophotometry

- [1] Wang, Y. W.; Liu, S. B.; Yang, Y. L.; Wang, P. Z.; Zhang, A. J.; Peng, Y. Terbium(III)-Complex-Based On–Off Fluorescent Chemosensor for Phosphate Anions in Aqueous Solution and Its Application in Molecular Logic Gates. *ACS Appl. Mater. Inter.* **2015**, 7, 4415-4422.
- [2] Wang, X. Y.; Yin, H. Q.; Yin, X. B. MOF@COFs with Strong Multiemission for Differentiation and Ratiometric Fluorescence Detection. *ACS Appl. Mater. Inter.* **2020**, 12, 18, 20973-20981.
- [3] Xu, H.; Cao, C. S.; Zhao, B. A Water-Stable Lanthanide-organic Framework as a Recyclable Luminescent Probe for Detecting Pollutant Phosphorus Anions. *Chem. Commun.* **2015**, 51, 10280-10283.
- [4] Lian, X.; Yan, B. A Postsynthetically Modified MOF Hybrid as a Ratiometric Fluorescent Sensor for Anion Recognition and Detection. *Dalton. Trans.* **2016**, 45, 18668-18675.
- [5] Afshari, M.; Dinari, M.; Farrokhpour, H.; Zamora, F. Covalent Organic Framework with a Naphthalene Moiety as a Sensitive Phosphate Ion Sensing. *ACS Appl. Mater. Inter.* **2022**, 14, 19, 22398-22406.
- [6] Yang, M.; Dai, Y.; Zhu, X. Y.; Wang, Z.; Li, Y. S.; Zhuang, Q. X.; Shi, J. L.; Gu, J. L. Metal–Organic Frameworks with Inherent Recognition Sites for Selective Phosphate Sensing through Their Coordination-Induced Fluorescence Enhancement Effect. *J. Mater. Chem. A* **2015**, 3, 7445-7452.
- [7] Guo, L. E.; Zhang, J. F.; Liu, X. Y.; Zhang, L. M.; Zhang, H. L.; Chen, J. H.; Xie, X. G.; Zhou, Y.; Luo, K. J.; Yoon, J. Y. Phosphate Ion Targeted Colorimetric and Fluorescent Probe and Its Use to Monitor Endogeneous Phosphate Ion in a Hemichannel-Closed Cell. *Anal. Chem.* **2015**, 87, 2, 1196-1201.
